# Supplementary material for: Solvent-dependent self-assemblies with multi-inverted circularly polarized luminescence based on 9,10-distyrylanthracene
Source: Royal Society of Chemistry journal article supplement (doi:10.1039/d5cc05562h), 2026-01-01
Supplement: d5cc05562h1.pdf [file d5cc05562h1.pdf]

Supporting Information for

**Solvent-dependent Self-assemblies with Multi-inverted  
Circularly Polarized Luminescence Based on 9,10-  
Distyrylanthracene**

Meng Wang, Yuxuan Song, Zhixuan Wang, Bin Xu\* and Wenjing Tian\*

*<sup>a</sup> State Key Laboratory of Supramolecular Structure and Materials, College of  
Chemistry, Jilin University, Changchun 130012, P. R. China.*

*E-mail: [xubin@jlu.edu.cn](mailto:xubin@jlu.edu.cn), [wjtian@jlu.edu.cn](mailto:wjtian@jlu.edu.cn)*

## Contents

|                                         |    |
|-----------------------------------------|----|
| 1. Synthesis and characterization. .... | 3  |
| 2. Experimental methods.....            | 4  |
| 3. Supplementary figures. ....          | 7  |
| 4. Supporting references.....           | 23 |

## 1. Synthesis and characterization.

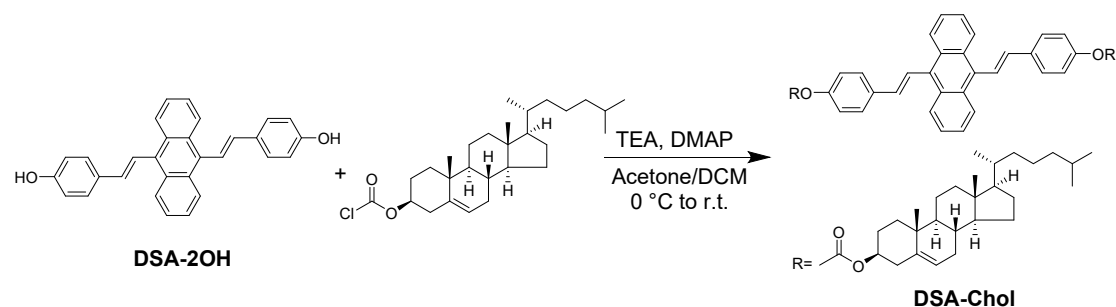

Synthesis method of DSA-2OH was referred to in previous work.<sup>1</sup> DSA-2OH (414 mg, 1 mmol), triethylamine (TEA, 3.3 mL), and 4-dimethylaminopyridine (DMAP, 10 mg) were dissolved in acetone (35 mL). The mixture was stirred under ice bath for 10 min. Subsequently, cholesteryl chloroformate (1.57 g, 3.5 mmol) was dissolved in 40 mL of dichloromethane (DCM), and the solution was added dropwise to the above mixture under stirring at 0 °C. Then the mixture was naturally warmed to room temperature and reacted for 8 h, with the reaction progress monitored by TLC. After the reaction was finished, the solvent was removed by rotary evaporation. The product was dissolved in chloroform, and the solution was washed sequentially with 1 M HCl, saturated brine, and water. The organic phase was dried over anhydrous MgSO<sub>4</sub>. Then the MgSO<sub>4</sub> was removed by filtration, and the crude product was purified by column chromatography (silica gel, eluent: petroleum ether:DCM = 3:1 to 1:1). The target product DSA-Chol was obtained as a yellow solid powder (0.69 g, yield: 55.7%).

**<sup>1</sup>H NMR** (500 MHz, Chloroform-*d*) , see Figure. S21 :  $\delta$  8.42 – 8.33 (m, 4H), 7.89 (d,  $J$  = 16.4 Hz, 2H), 7.74 – 7.66 (m, 4H), 7.49 (dt,  $J$  = 6.9, 3.5 Hz, 4H), 7.32 – 7.27 (m, 4H), 6.92 (d,  $J$  = 16.5 Hz, 2H), 5.45 (dt,  $J$  = 4.5, 2.1 Hz, 2H), 4.63 (tt,  $J$  = 10.9, 5.1 Hz, 2H), 2.53 (tdd,  $J$  = 13.6, 9.1, 4.0 Hz, 4H), 2.14 – 1.70 (m, 13H), 1.66 – 0.80 (m, 63H), 0.70 (s, 6H).

**<sup>13</sup>C NMR** (126 MHz, Chloroform-*d*) , see Figure. S22 :  $\delta$  152.94, 150.87, 139.17, 136.42, 135.14, 132.54, 129.56, 127.56, 126.40, 125.50, 125.36, 123.25, 121.52, 78.99, 56.71, 56.15, 50.02, 42.34, 39.74, 39.53, 37.99, 36.87, 36.59, 36.20, 35.80,

31.94, 31.87, 28.24, 28.03, 27.70, 24.30, 23.84, 22.83, 22.57, 21.08, 19.32, 18.73, 11.88.

**MALDI-TOF-MS**, see Figure. S23 :m/z calcd. for C<sub>86</sub>H<sub>110</sub>O<sub>6</sub> [M+H]<sup>+</sup> 1239.84, found: 1239.80.

## 2. Experimental methods.

**Materials.** Except the DSA-2OH, all chemicals and solvents were used without further purification. Cholesteryl chloroformate, triethylamine (TEA) and 4-dimethylaminopyridine (DMAP) were purchased from TCI. Dichloromethane (DCM), petroleum ether and methanol used in synthesis were purchased from Shanghai Titan Scientific Co., Ltd. Acetone, hydrochloric acid and chloroform were purchased from Jilin Haodi Chemical Reagents Distribution Co., Ltd. Mg<sub>2</sub>SO<sub>4</sub> was purchased from Tianjin Guangfu Technology Development Co., Ltd. Tetrahydrofuran (THF) and methanol used for assembly were both of spectroscopic grade and purchased from Shanghai Aladdin Biochemical Technology Co., Ltd. All the water used in the experiment and measurement was Milli-Q water (18.2 MΩ·cm).

**Assembly sample preparation.** 10.0 mg DSA-Chol sample was dispersed into 10 mL of spectroscopic grade THF as a stock solution. Taking the preparation of DSA-Chol in THF-H<sub>2</sub>O (*f*<sub>w</sub> = 80%, v/v) as an example. 1 mL stock solution was added in a 20 mL vials, and 1mL THF and 8 mL water were added into the solution in turn. The mixture was ultrasonicated for five minutes and subsequently allowed to stand for more than 1 hour to complete the assembly process ([DSA-Chol] = 8.07 × 10<sup>-5</sup> mol/L).

**Single crystal preparation.** The DSA-Chol single crystal were obtained through solvent evaporation method in dichloromethane/acetone/methanol mixed solvent.

**Density functional theory (DFT) computation.** DFT and time-dependent density functional theory (TD-DFT) calculations were performed by Gaussian 16W program at B3LYP 6-311G(d) and CAM-B3LYP/6-31G(d) levels, respectively.

**Ultraviolet-visible absorption spectra.** The samples were recorded on a Shimadzu UV-2550 spectrophotometer.

**Fluorescence spectra.** The fluorescence spectra were recorded on a Shimadzu RF-5301 PC spectrometer. The width of the excitation and emission slits were 1.5 nm and the excitation wavelength ( $\lambda_{\text{ex}}$ ) was 400 nm.

**Fluorescence quantum yields.** The samples were tested on a FLS980-S2S2-stm steadystate transient fluorescence spectrometer by using an integrating sphere.

**NMR spectra.**  $^1\text{H}$  NMR,  $^{13}\text{C}$  NMR spectra were recorded on a Bruker AVANCE III 500MHz system.

**Mass spectra.** Mass spectrum data were obtained by using a Kratos MALDI-TOF mass system.

**Scanning electron microscopy (SEM).** Solution aggregates were cast on a silicon wafer. After being dried in air, the sample was coated with a thin layer of Pt to enhance the electrical conductivity. Then the sample was imaged using a Hitachi Regulus8100 UHR FE-SEM or a Hitachi SU8020 CFE-SEM with an accelerating voltage of 3.0 kV and an operating current of 10  $\mu\text{A}$ .

**Transmission electron microscopy (TEM).** Solution aggregates were dropped on a pure carbon film-coated copper grid and air-dried before measurement. Then the sample was imaged using a JEOL JEM-2100F instrument with an accelerating voltage of 120 kV.

**Atomic force microscopy (AFM).** Solution aggregates were cast on a mica wafer. After being dried in air, the sample was imaged using a Bruker ICON-XR instrument.

**Circular dichroism (CD) spectra.** CD spectra were measured using a JASCO J-1700 CD spectrometer at a scanning rate of 200 nm/min.

**Circularly polarized luminescence (CPL) spectra.** CPL spectra were measured using a JASCO CPL-300 spectrophotometer at a scanning rate of 200 nm/min. CPL spectra were converted to  $g_{lum}$  spectra using SpectraManager (JASCO) software. Each sample was tested several times by rotating to 0°, 90°, and 180° angles.

**Single crystal X-ray diffraction.** Single-crystal X-ray diffraction data were collected using synchrotron radiation and MAR325 CCD detector at Shanghai Synchrotron Radiation BL17B Beamline. The crystal structure was solved with SHELXT-2014/7 (Sheldrick, 2015) and refined using SHELXL-2014/7 (Sheldrick, 2015). Molecular graphics and publication materials were prepared with Bruker SHELXTL. The measurement method employed phi and omega scans. The completeness was low at 89.3% due to the data collection strategy as the space group was found to be *P1*. The crystals were difficult to obtain and the data had to be collected at a synchrotron, however the data is sufficient to confirm the proposed structure.

**Powder X-ray diffraction (PXRD).** PXRD analysis was performed on a Rigaku SmartLab 3 diffractometer with Cu/K $\alpha$  radiation ( $\lambda = 1.5406 \text{ \AA}$ ), which was operated at a voltage of 40 kV and a current of 30 mA. Samples were prepared on glass wafers and air-dried for PXRD testing.

**Fourier transform infrared (FT-IR).** FT-IR spectra were recorded on a Bruker VERTEX 80V FT-IR spectrometer. The sample was ground into powder and dried, then mixed with dried KBr (powder) and pressed into piece.

### 3. Supplementary figures.

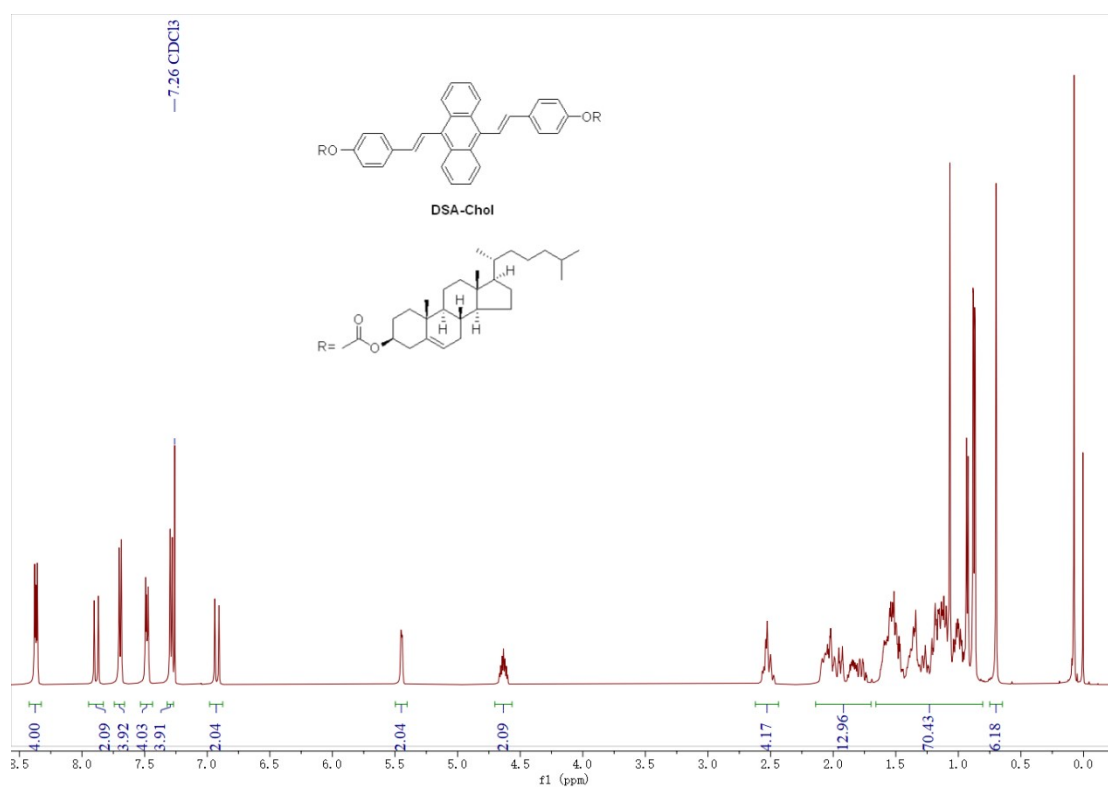

**Fig. S1** <sup>1</sup>H-NMR spectrum of DSA-Chol.

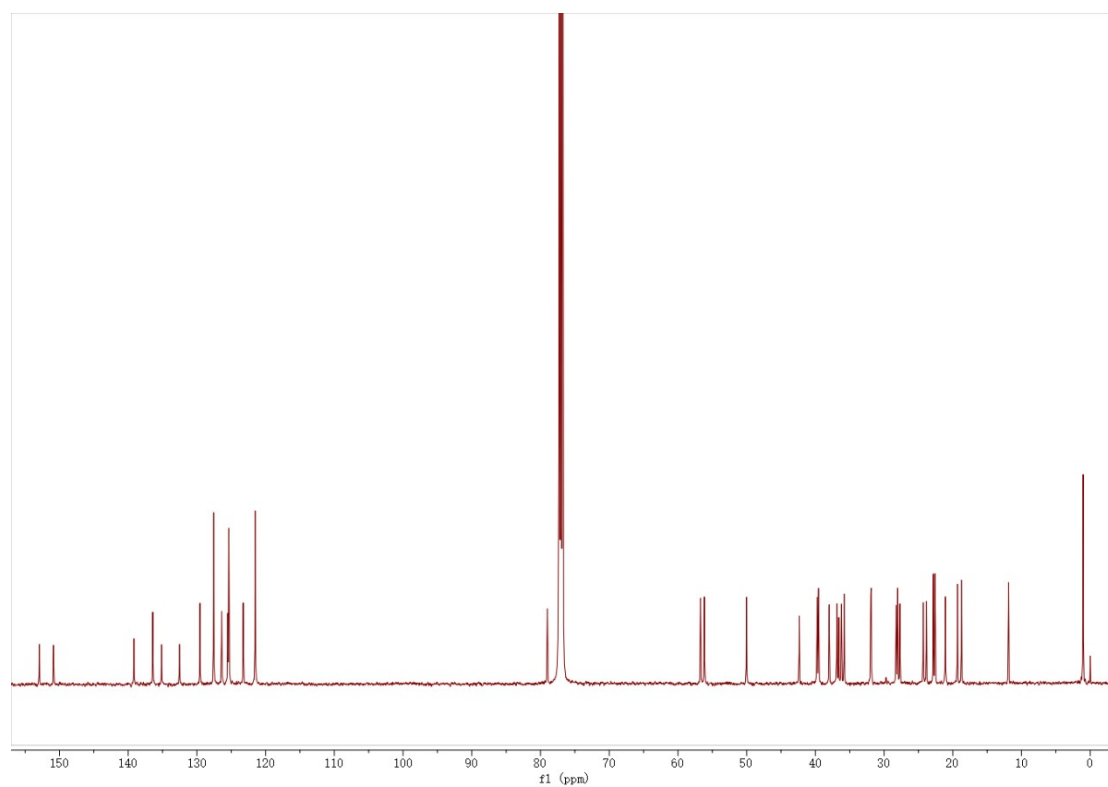

**Fig. S2** <sup>13</sup>C-NMR spectrum of DSA-Chol.



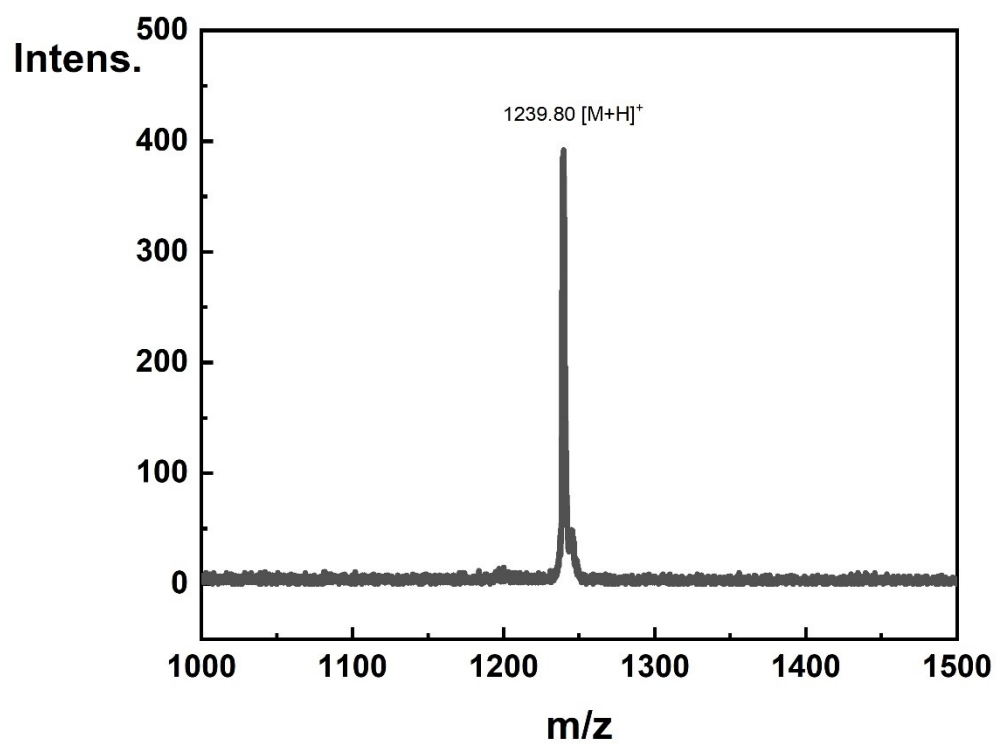

**Fig. S3** MALDI-TOF-MS spectrum of DSA-Chol.

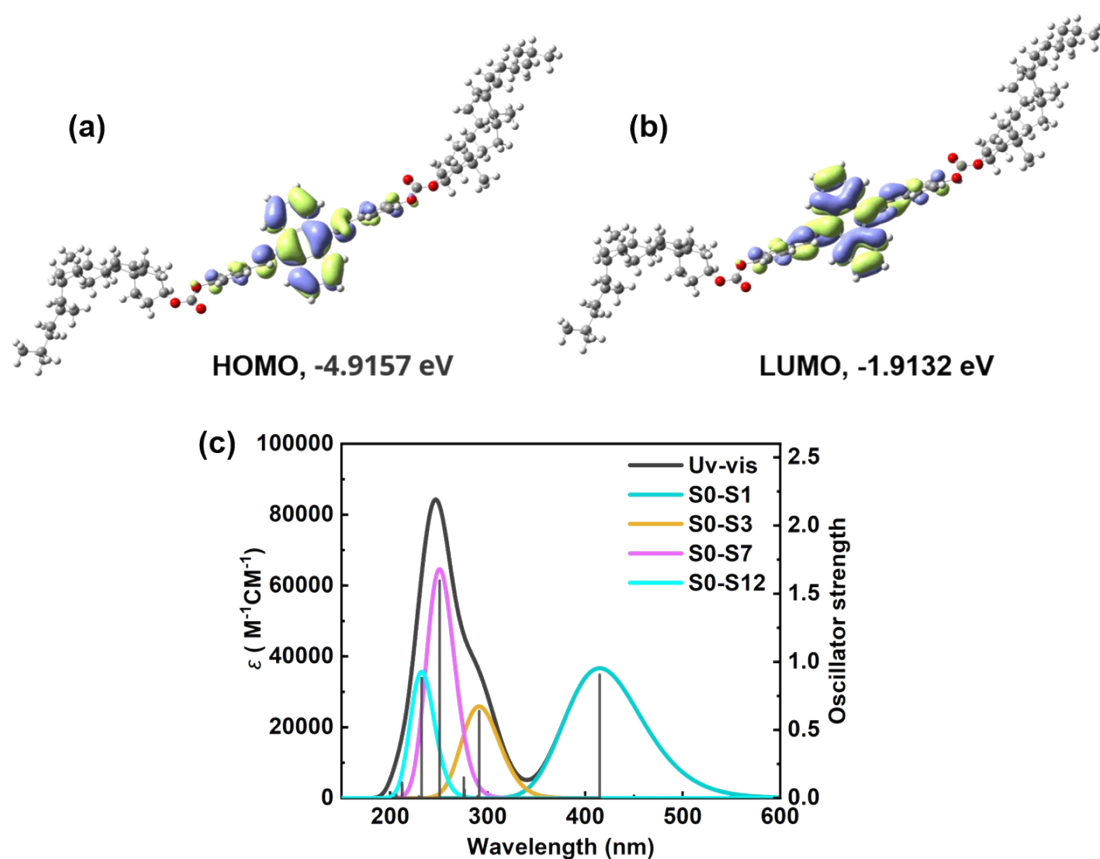

**Fig. S4** (a) and (b) Frontier molecular orbitals of DSA-Chol calculated by DFT at B3LYP/6-311G(d,p) level.<sup>2</sup> The carbon, hydrogen and oxygen atoms are represented by gray, white and red balls, respectively. (c) Calculated UV-vis spectrum of DSA-Chol (black line) and contributions of different transitions. TD-DFT at CAM-B3LYP/6-31G(d) level. The data was analysed with the help of Multiwfn program.<sup>3</sup>

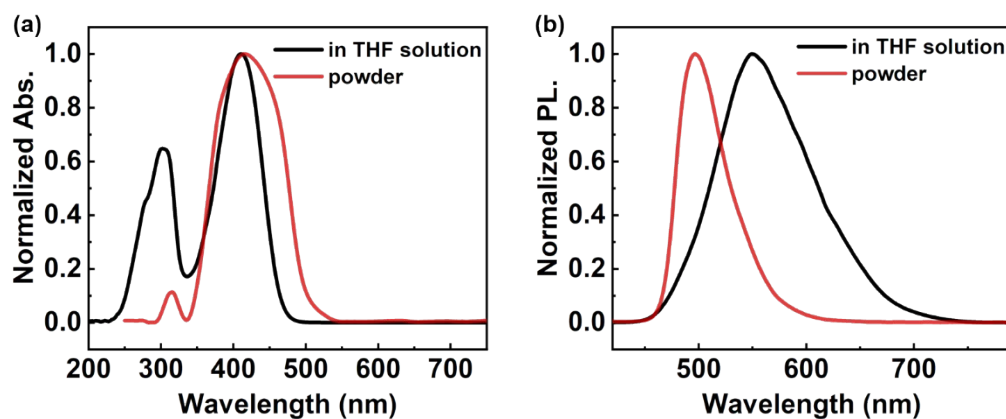

**Fig. S5** Experimental (a) absorption spectra and (b) fluorescence spectra of DSA-Chol in powder state and in dilute THF solution ( $[DSA-Chol] = 8.07 \times 10^{-5}$  mol/L).

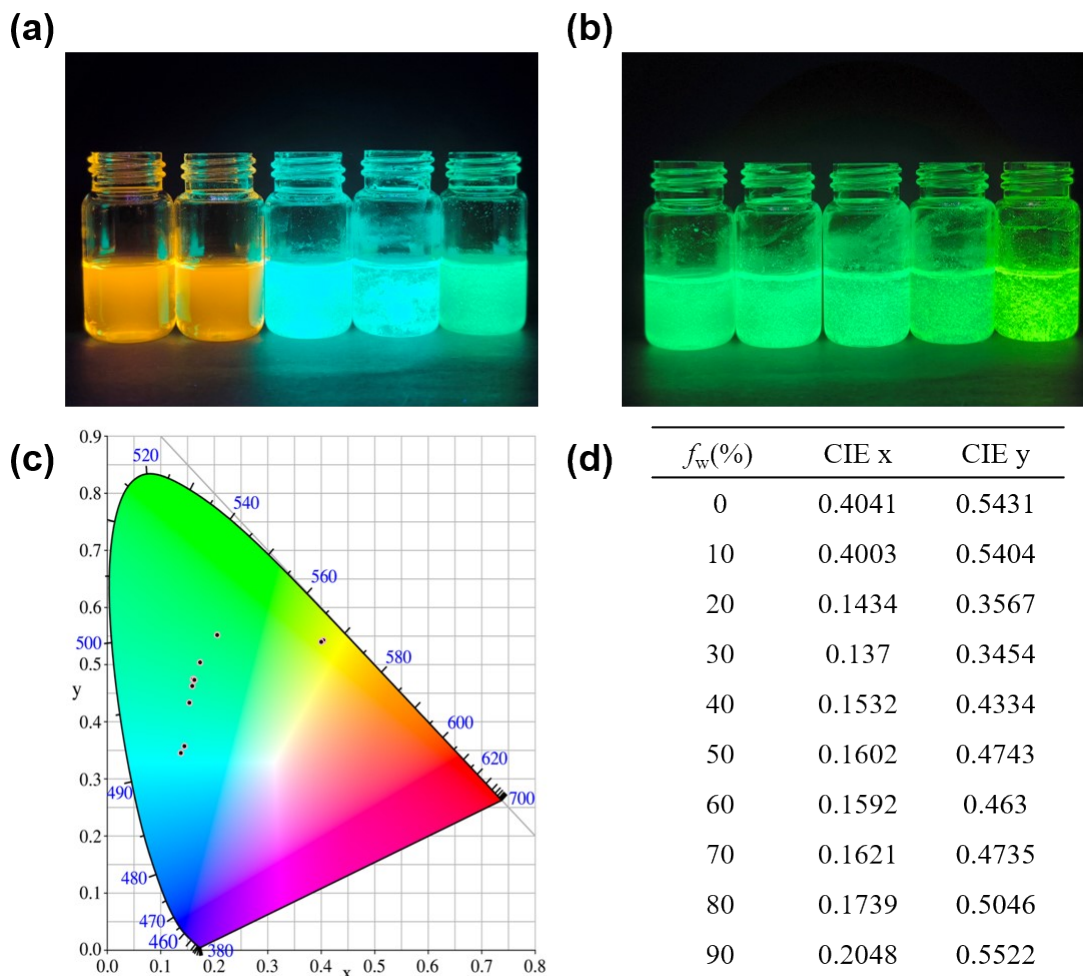

**Fig. S6** Fluorescence images of DSA-Chol assemblies in the aqueous system under 365 nm UV lamp irradiation: (a)  $f_w$  ranging from 0 to 40% (from left to right); (b)  $f_w$  ranging from 50% to 90% (from left to right). (c) CIE diagram and (d) xy coordinates of the emission colors at excitation wavelength of 400 nm ( $\lambda_{ex} = 400$  nm).

**Table. S1** Fluorescence quantum yields (QY or  $\Phi$ ) at different water fractions.

| $f_w(\%)$       | $\Phi(\%)^{[a]}$ |
|-----------------|------------------|
| dilute solution | 19.31            |
| 0               | 18.71            |
| 10              | 15.06            |
| 20              | 21.53            |
| 30              | 28.5             |
| 40              | 24.55            |

|    |       |
|----|-------|
| 50 | 31.82 |
| 60 | 24.99 |
| 70 | 24.95 |
| 80 | 18.79 |
| 90 | 20.67 |

[a] [DSA-Chol] =  $8.07 \times 10^{-5}$  M in THF/H<sub>2</sub>O mixture (v/v).

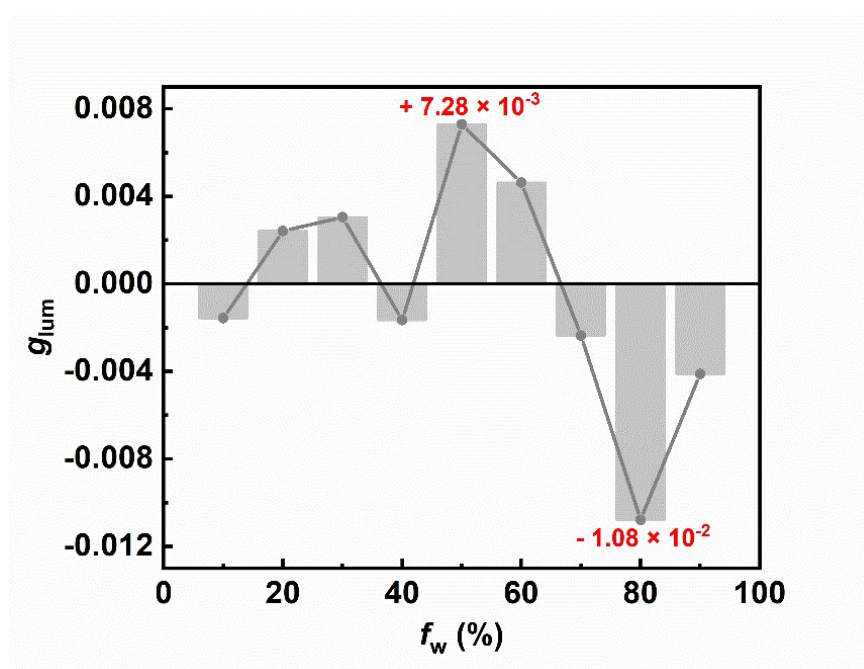

**Fig. S7** Changes of the maximum  $g_{lum}$  values at different water fractions.

**Table. S2** The maximum  $g_{lum}$  values at different fractions.

| $f_w$ (%) | $g_{lum}^{[a]}$ |
|-----------|-----------------|
| 10        | - 0.00158       |
|           | ( at 626 nm )   |
| 20        | 0.00241         |
| 30        | 0.00304         |
| 40        | - 0.00166       |
| 50        | 0.00728         |
| 60        | 0.00462         |
| 70        | - 0.00237       |

|    |           |
|----|-----------|
| 80 | -0.01079  |
| 90 | - 0.00412 |

[a] Measured at the maximum signal.<sup>4</sup>

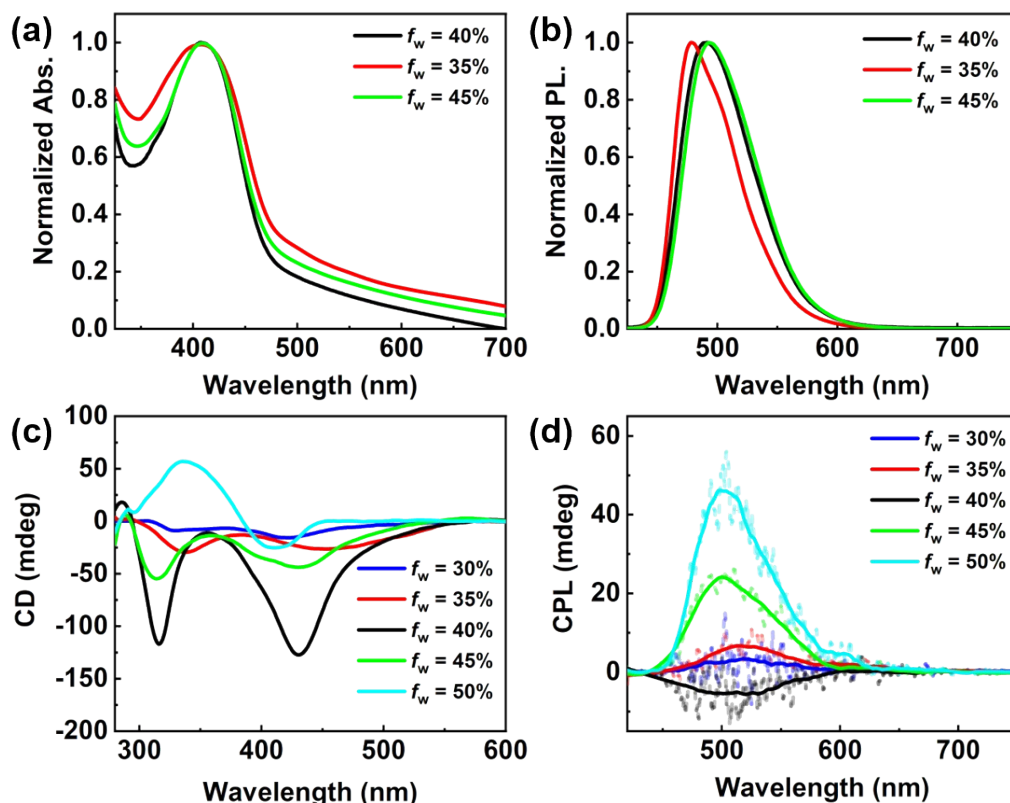

**Fig. S8** (a) Absorption spectra and (b) fluorescence spectra of DSA-Chol in THF/H<sub>2</sub>O at  $f_w = 35$ -45%. (c) CD spectra and (b) CPL spectra of DSA-Chol in THF/H<sub>2</sub>O at  $f_w = 30$ -50%.

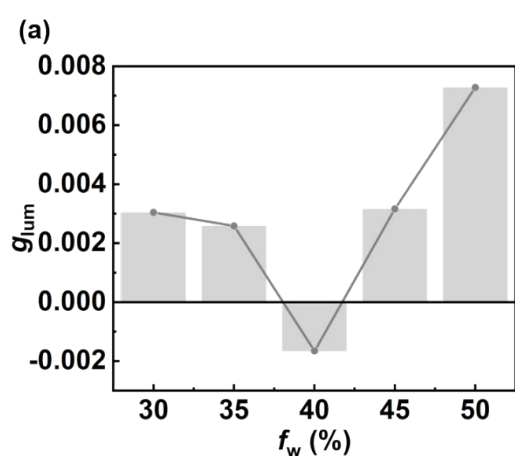

| $f_w$ (%) | $g_{lum}^{[a]}$          |
|-----------|--------------------------|
| 30        | 0.00304<br>(at 502.5 nm) |
| 35        | 0.00258<br>(at 525 nm)   |
| 40        | - 0.00166                |
| 45        | 0.00316                  |
| 50        | 0.00728                  |

[a] Measured at the maximum signal.

**Fig. S9** (a) Changes and (b) specific values of the maximum  $g_{lum}$  at  $f_w = 30$ -50%.

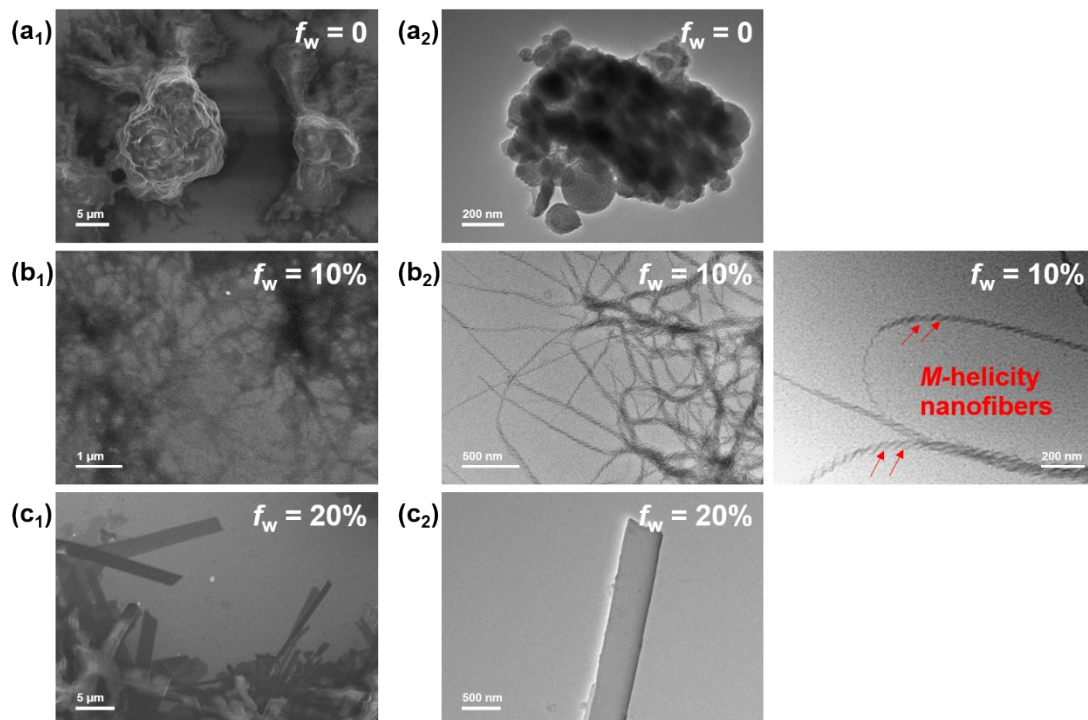

**Fig. S10** (a<sub>1</sub>) SEM image and (a<sub>2</sub>) TEM image of DSA-Chol assemblies at  $f_w = 0$ . (b<sub>1</sub>) SEM image and (b<sub>2</sub>) TEM images of DSA-Chol assemblies at  $f_w = 10\%$ . The nanofibers are difficult to observe under SEM possibly due to the poor conductivity of the assemblies. (c<sub>1</sub>) SEM image and (c<sub>2</sub>) TEM image of DSA-Chol assemblies at  $f_w = 20\%$ .

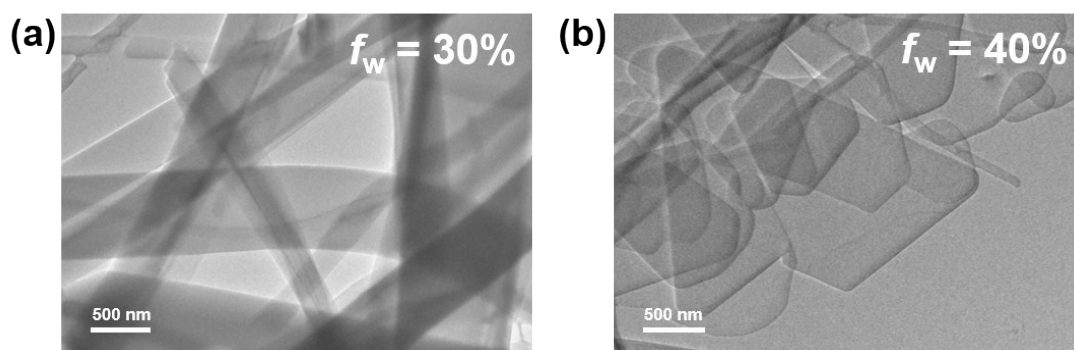

**Fig. S11** TEM images of DSA-Chol assemblies at (a)  $f_w = 30\%$  and (b)  $f_w = 40\%$ .

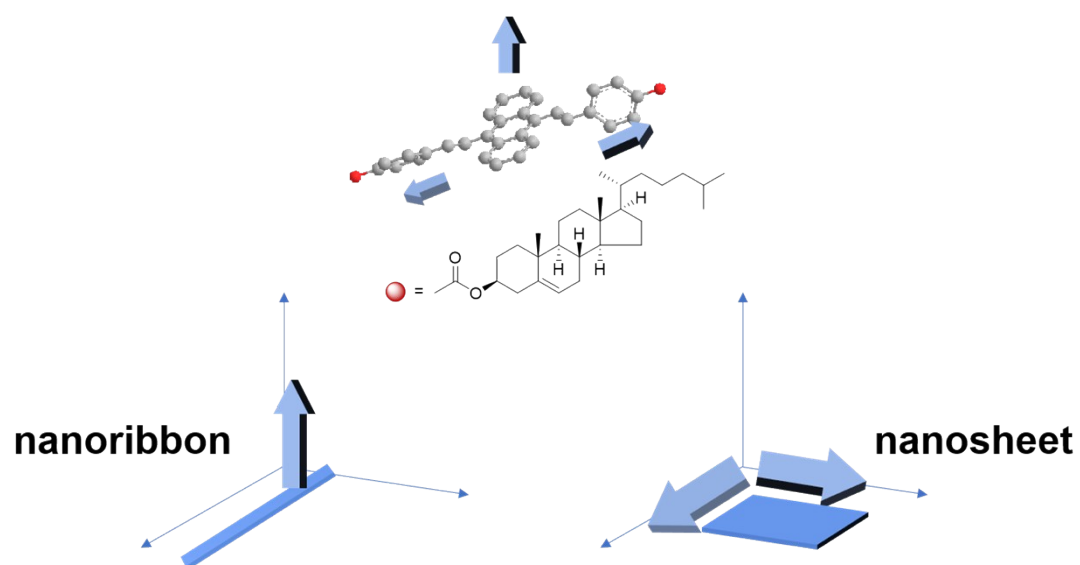

**Fig. S12** Schematic diagram of two spatial packing orientations of DSA-Chol molecules.



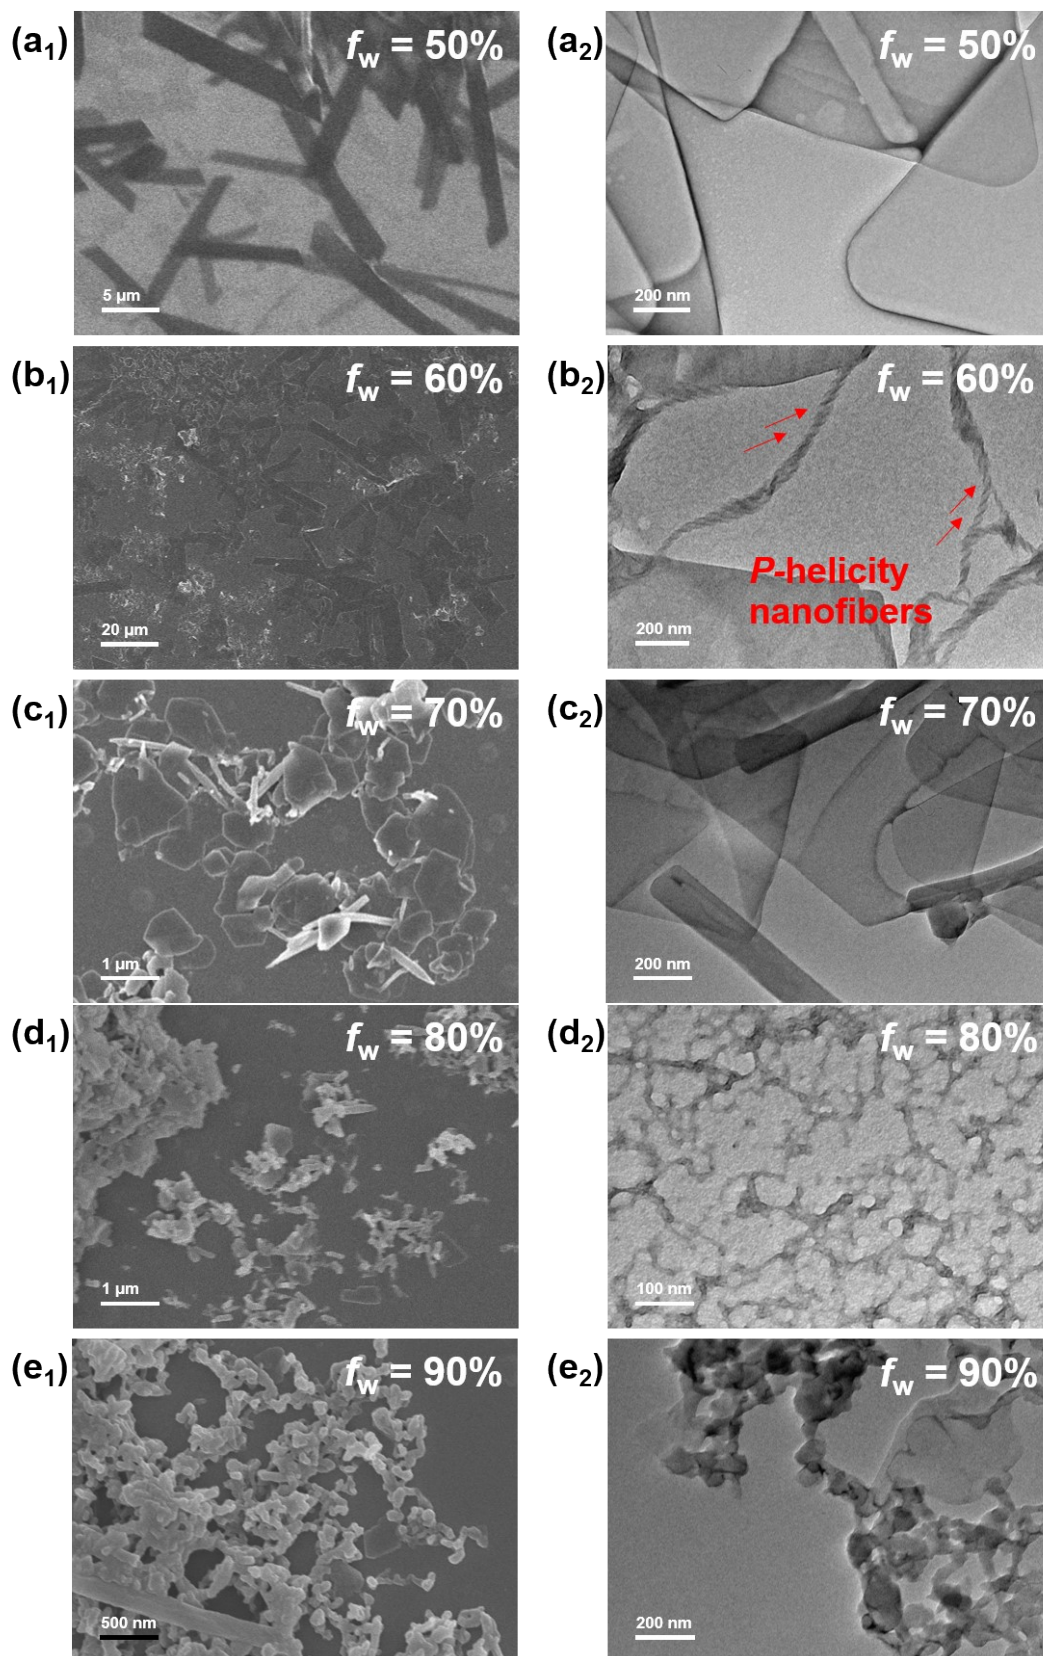

**Fig. S13** SEM images of DSA-Chol assemblies at  $(a_1) f_w = 50\%$ ,  $(b_1) f_w = 60\%$ ,  $(c_1) f_w = 70\%$ ,  $(d_1) f_w = 80\%$  and  $(e_1) f_w = 90\%$ . TEM images of DSA-Chol assemblies at  $(a_2) f_w = 50\%$ ,  $(b_2) f_w = 60\%$ ,  $(c_2) f_w = 70\%$ ,  $(d_2) f_w = 80\%$  and  $(e_2) f_w = 90\%$ .



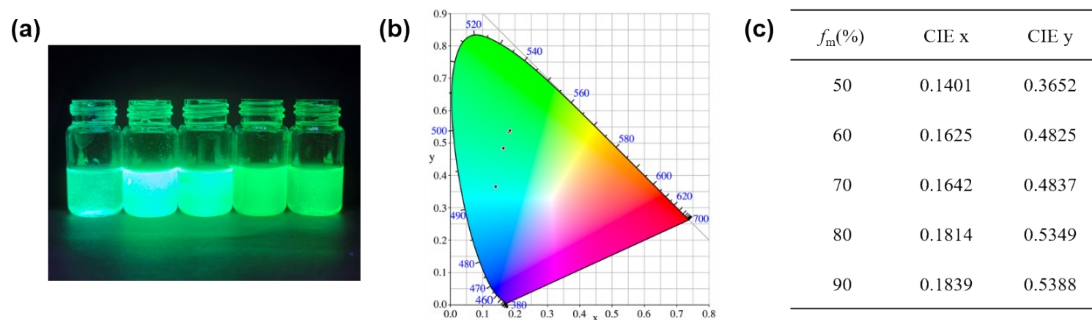

**Fig. S14** (a) Fluorescence image of DSA-Chol assemblies in the methanol system under 365 nm UV lamp irradiation, with  $f_m$  ranging from 50% to 90% (from left to right). (b) CIE diagram and (c) xy coordinates of the emission colors at excitation wavelength of 400 nm ( $\lambda_{\text{ex}} = 400 \text{ nm}$ ).

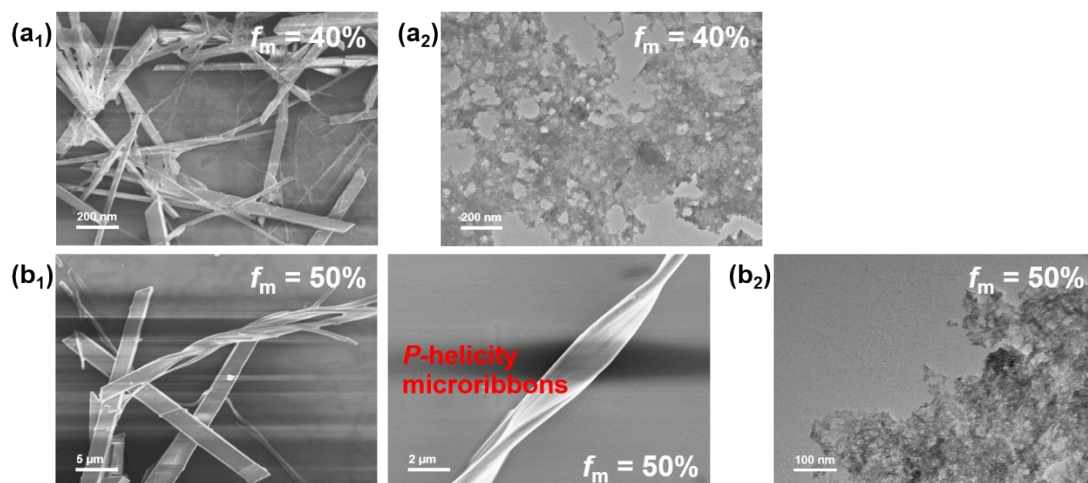

**Fig. S15** (a<sub>1</sub>) SEM image and (a<sub>2</sub>) TEM image of DSA-Chol assemblies at  $f_m = 40\%$ . (b<sub>1</sub>) SEM images and (b<sub>2</sub>) TEM image of DSA-Chol assemblies at  $f_m = 50\%$ .

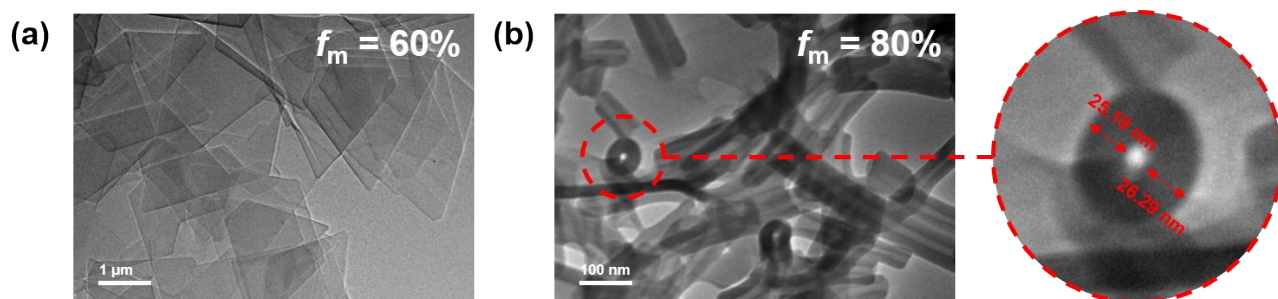

**Fig. S16** TEM images of DSA-Chol assemblies at (a)  $f_m = 60\%$  and (b)  $f_m = 80\%$ .

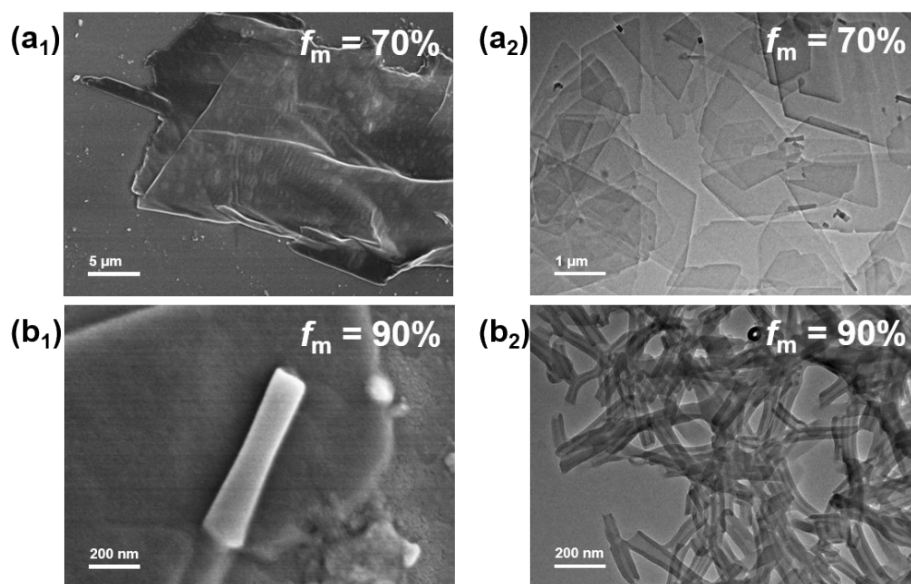

**Fig. S17** (a<sub>1</sub>) SEM image and (a<sub>2</sub>) TEM image of DSA-Chol assemblies at  $f_m = 70\%$ .  
(b<sub>1</sub>) SEM image and (b<sub>2</sub>) TEM image of DSA-Chol assemblies at  $f_m = 90\%$ .

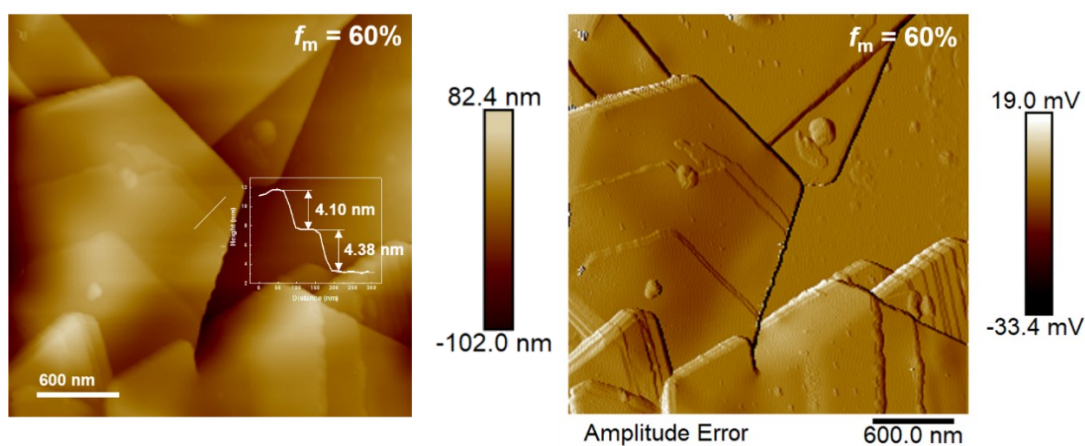

**Fig. S18** AFM images of DSA-Chol assemblies at  $f_m = 60\%$ .

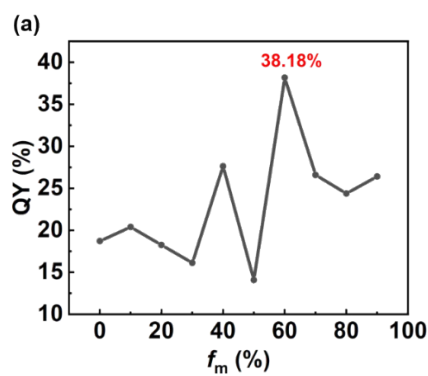

| $f_m(\%)$ | $\Phi(\%)^{[a]}$ |
|-----------|------------------|
| 0         | 18.71            |
| 10        | 20.38            |
| 20        | 18.25            |
| 30        | 16.12            |
| 40        | 27.62            |
| 50        | 14.08            |
| 60        | 38.18            |
| 70        | 26.59            |
| 80        | 24.38            |
| 90        | 26.40            |

[a] [DSA-Chol] =  $8.07 \times 10^{-5}$  M in THF/methanol mixture (v/v).

**Fig. S19** (a) Changes and (b) specific values of the fluorescence quantum yields of DSA-Chol in THF/methanol system.

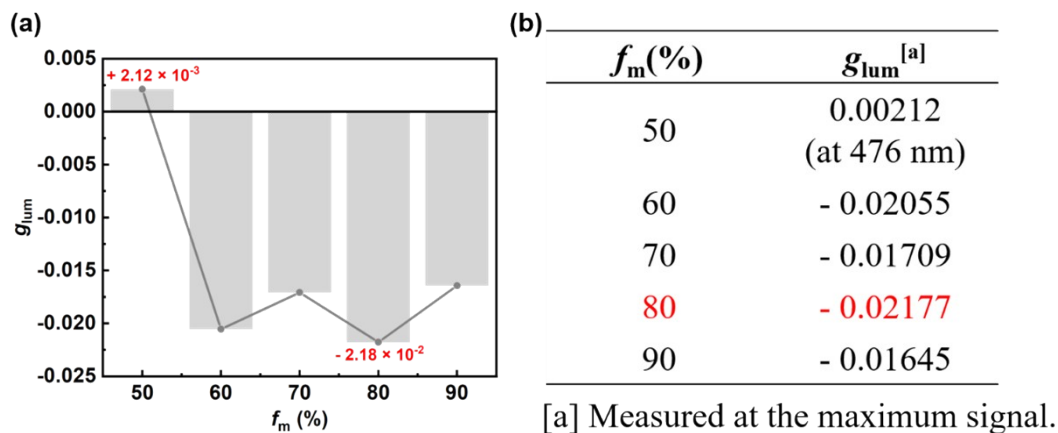

**Fig. S20** (a) Changes and (b) specific values of the maximum  $g_{lum}$  at  $f_m = 50$ -90%.

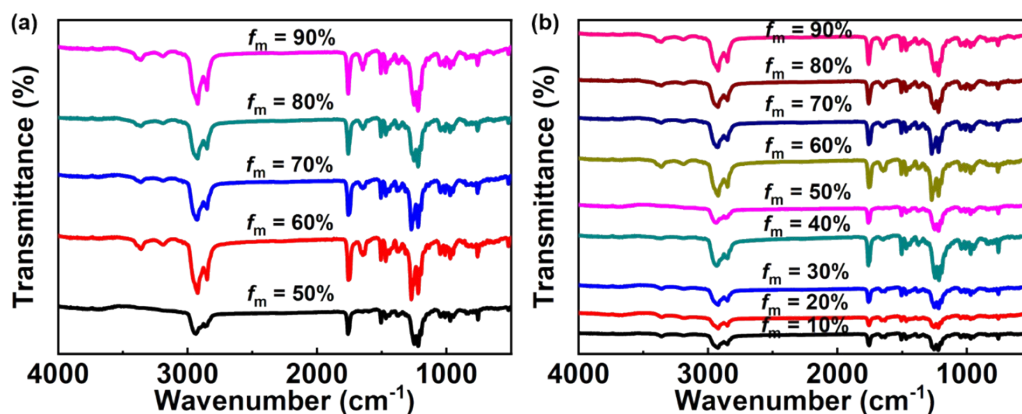

**Fig. S21** (a) Stacked FT-IR spectra of DSA-Chol assemblies at  $f_m = 50$ -90%. (b) Stacked FT-IR spectra of DSA-Chol assemblies in THF/methanol system.

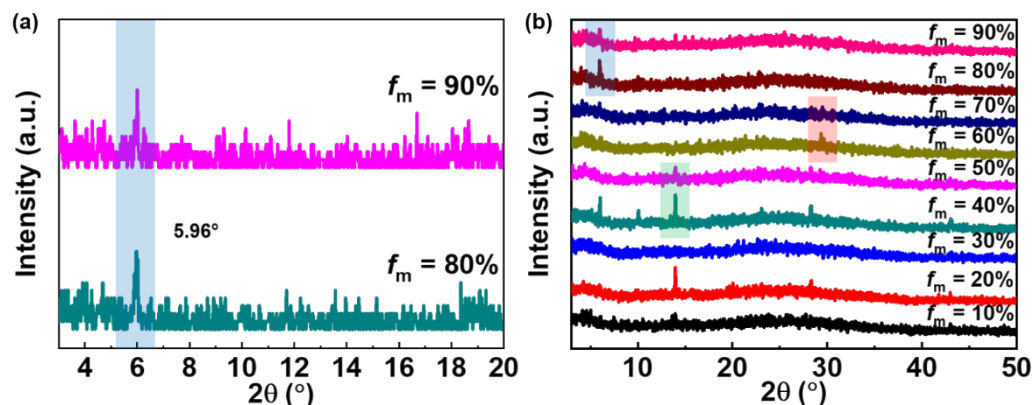

**Fig. S22** (a) Small-angle stacked PXRD patterns of DSA-Chol assemblies at  $f_m = 80\%$  and 90%. (b) Stacked PXRD patterns of DSA-Chol assemblies in THF/methanol system.

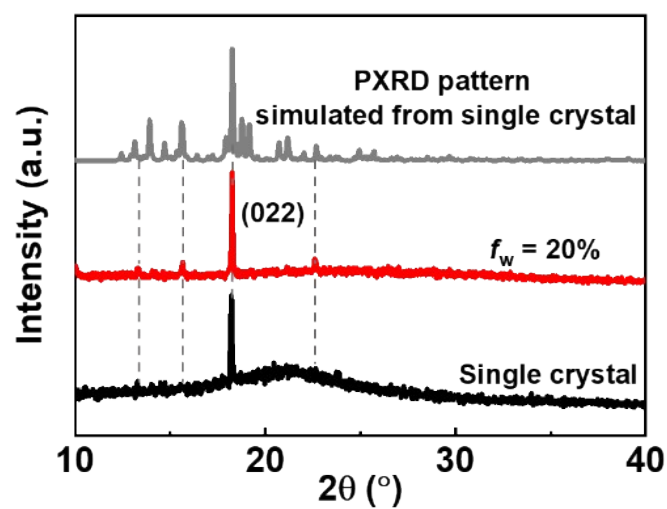

**Fig. S23** PXRD patterns for the experimental single crystal (black line), those simulated from single-crystal data (gray line), and the assembly system with 20% water content (red line).

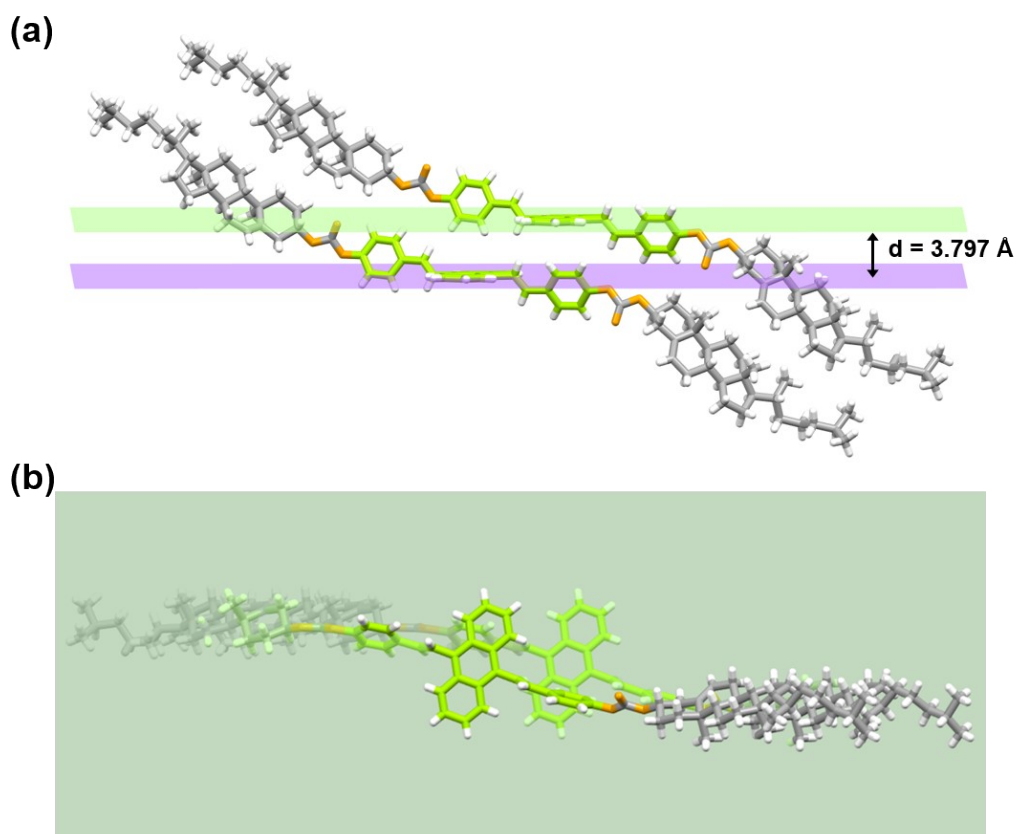

**Fig. S24** (a) Side view and (b) top view with the central anthracene moiety as the reference plane.



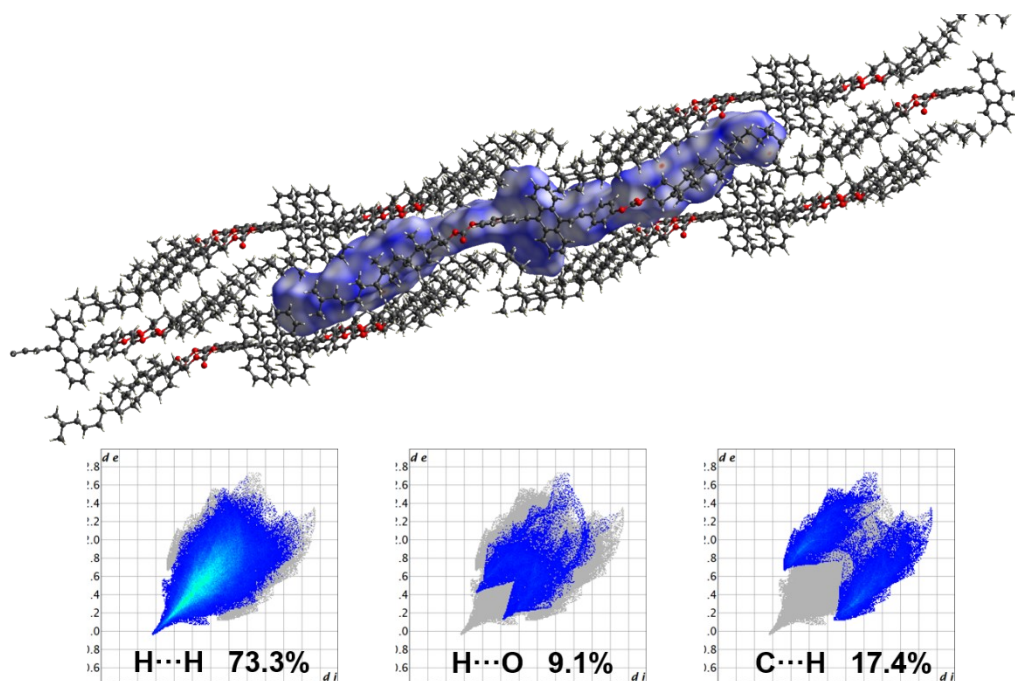

**Fig. S25** Hirshfeld surface analysis of the DSA-Chol single crystal and fingerprint plots of different intermolecular interactions.

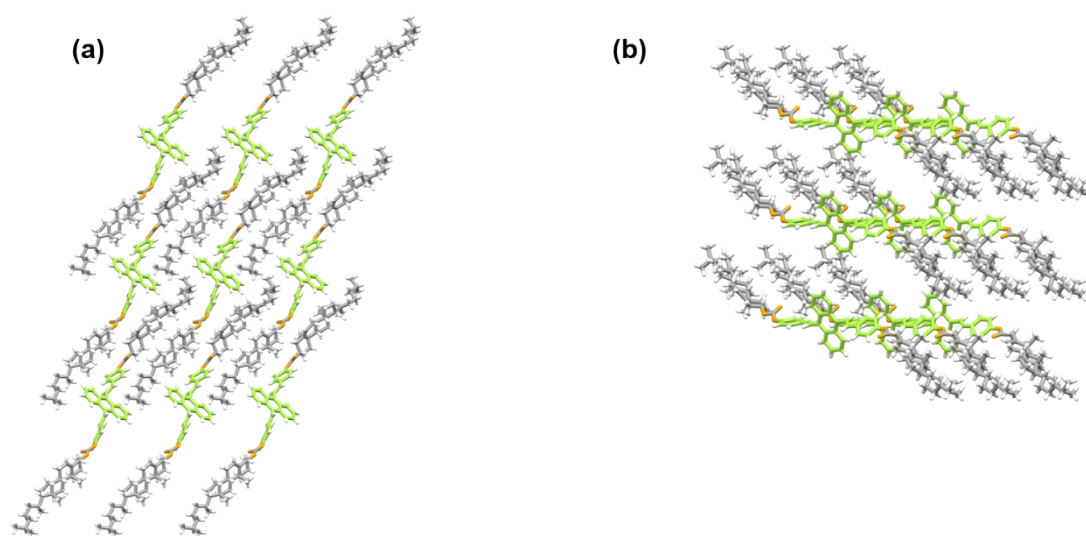

**Fig. S26** Molecular packing mode of the crystal viewed along the (a) a-axis and the (b) c-axis.

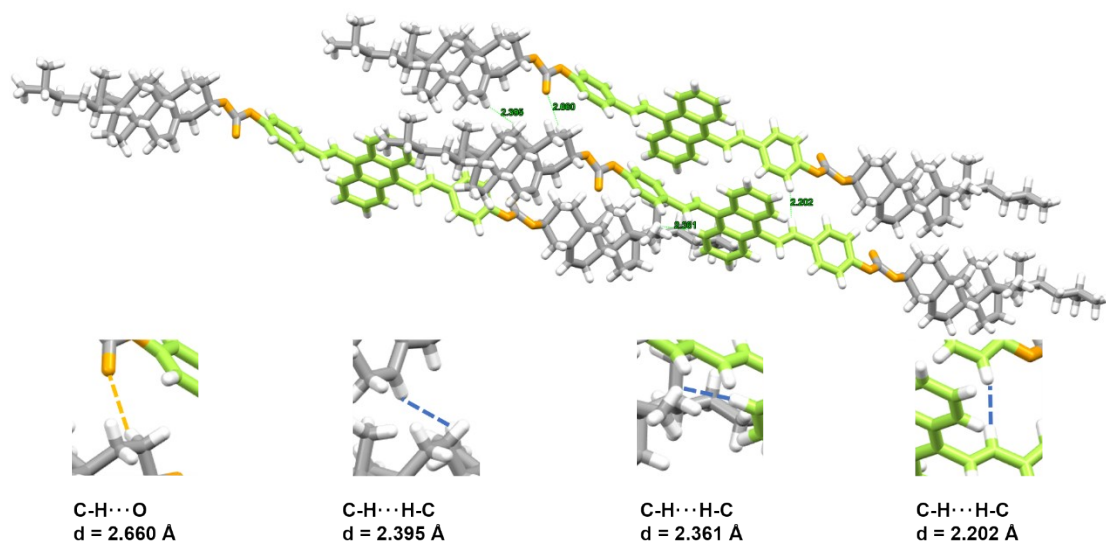

**Fig. S27** Intermolecular interactions within the single crystal.

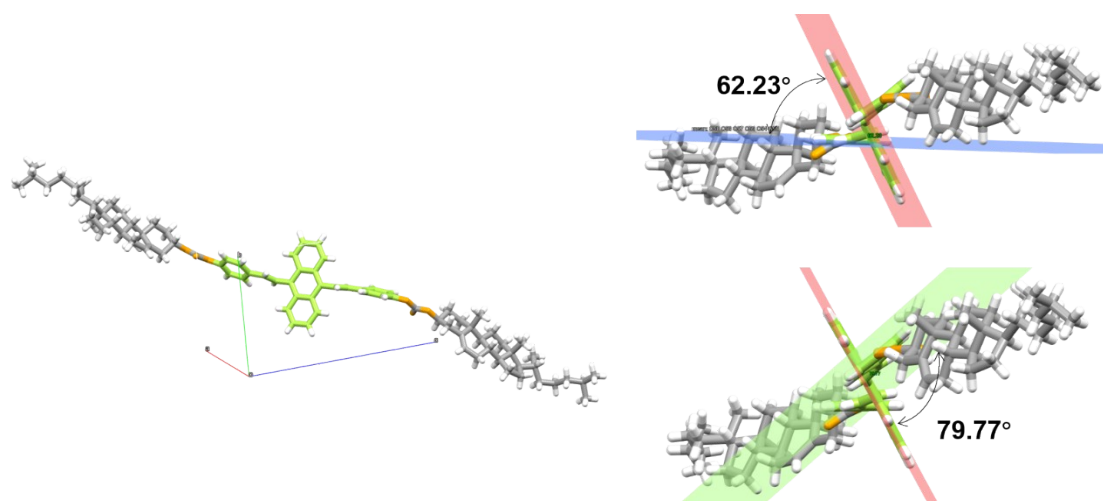

**Fig. S28** Dihedral angles between the central anthracene unit and the styryl groups on both sides of the DSA moiety.

**Table. S3** Single crystal structure and refinement parameters

| Name                              | DSA-Chol           |
|-----------------------------------|--------------------|
| empirical formula                 | $C_{86}H_{110}O_6$ |
| formula wt                        | 1239.73            |
| $T$ [K]                           | 293                |
| crystal system, space group       | P 1                |
| $a$ [Å]                           | 7.1333(9)          |
| $b$ [Å]                           | 12.7580(19)        |
| $c$ [Å]                           | 20.093(3)          |
| $\alpha$ [deg]                    | 102.376(4)         |
| $\beta$ [deg]                     | 90.215(4)          |
| $\gamma$ [deg]                    | 94.854(4)          |
| $V$ [Å <sup>3</sup> ]             | 1779.3(4)          |
| $Z$                               | 1                  |
| F (000)                           | 674.0              |
| density, Mg/m <sup>3</sup>        | 1.157              |
| $\mu$ [mm <sup>-1</sup> ]         | 0.070              |
| $\theta$ range [deg]              | 2.820-26.150       |
| no. of reflections collected      | 18148              |
| no. of unique reflections         | 10699              |
| $R$ (int)                         | 0.0476             |
| Good-of-fit on $F^2$              | 1.053              |
| $R_I$ [ $I > 2\sigma(I)$ ]        | 0.0688             |
| $\omega R_2$ [ $I > 2\sigma(I)$ ] | 0.1905             |
| $R_I$ (all data)                  | 0.0717             |
| $\omega R_2$ (all data)           | 0.1968             |

#### 4. Supporting references.

1. Y. Zhang, Y. Chen, X. Li, J. Zhang, J. Chen, B. Xu, X. Fu and W. Tian, *Polymer Chemistry*, 2014, **5**, 3824-3830.
2. Gaussian 16, Revision A.03, M. J. Frisch, G. W. Trucks, H. B. Schlegel, G. E. Scuseria, M. A. Robb, J. R. Cheeseman, G. Scalmani, V. Barone, G. A. Petersson, H. Nakatsuji, X. Li, M. Caricato, A. V. Marenich, J. Bloino, B. G. Janesko, R. Gomperts, B. Mennucci, H. P. Hratchian, J. V. Ortiz, A. F. Izmaylov, J. L. Sonnenberg, D. Williams-Young, F. Ding, F. Lipparini, F. Egidi, J. Goings, B. Peng, A. Petrone, T. Henderson, D. Ranasinghe, V. G. Zakrzewski, J. Gao, N. Rega, G. Zheng, W. Liang, M. Hada, M. Ehara, K. Toyota, R. Fukuda, J. Hasegawa, M. Ishida, T. Nakajima, Y. Honda, O. Kitao, H. Nakai, T. Vreven, K. Throssell, J. A. Montgomery, Jr., J. E. Peralta, F. Ogliaro, M. J. Bearpark, J. J. Heyd, E. N. Brothers, K. N. Kudin, V. N. Staroverov, T. A. Keith, R. Kobayashi, J. Normand, K. Raghavachari, A. P. Rendell, J. C. Burant, S. S. Iyengar, J. Tomasi, M. Cossi, J. M. Millam, M. Klene, C. Adamo, R. Cammi, J. W. Ochterski, R. L. Martin, K. Morokuma, O. Farkas, J. B. Foresman, and D. J. Fox, Gaussian, Inc., Wallingford CT, 2016.
3. (a) T. Lu and F. Chen, *Journal of Computational Chemistry*, 2012, **33**, 580-592; (b) T. Lu, *The Journal of Chemical Physics*, 2024, **161**, 082503.
4. C. Tu, W. Wu, W. Liang, D. Zhang, W. Xu, S. Wan, W. Lu and C. Yang, *Angewandte Chemie International Edition*, 2022, **61**, e202203541.
